# Supplementary material for: Identification and characterization of the CRK gene family in the wheat genome and analysis of their expression profile in response to high temperature-induced male sterility
Source: PeerJ. 2024 May 7;12:e17370. doi: 10.7717/peerj.17370 (PMC11086307; doi:10.7717/peerj.17370)
Supplement: Supplemental Information 3 [file peerj-12-17370-s003.xls]

## Sheet: Sheet1
ITEM TO CHECK	IMPORTANCE	CHECKLIST
EXPERIMENTAL DESIGN
Definition of experimental and control groups	E	Line118-122
Number within each group	E	Line122-124
Assay carried out by core lab or investigator's lab?	D
Acknowledgement of authors' contributions	D
SAMPLE
Description	E	Line122-124
Volume/mass of sample processed	D
Microdissection or macrodissection	E	Line122-124
Processing procedure	E	Line118-124
If frozen - how and how quickly?	E	Line123
If fixed - with what, how quickly?	E	Line122-124
Sample storage conditions and duration (especially for FFPE samples)	E	Line122-124
NUCLEIC ACID EXTRACTION
Procedure and/or instrumentation	E	Line187-188
Name of kit and details of any modifications	E	Line188-189
Source of additional reagents used	D
Details of DNase or RNAse treatment	E	Line186-187
Contamination assessment (DNA or RNA)	E	Line186-187
Nucleic acid quantification	E	Line184-186
Instrument and method	E	Line188-191
Purity (A260/A280)	D
Yield	D
RNA integrity method/instrument	E	Line184-186
RIN/RQI or Cq of 3' and 5' transcripts	E	Line188-189
Electrophoresis traces	D
Inhibition testing (Cq dilutions, spike or other)	E	Line188-189
REVERSE TRANSCRIPTION
Complete reaction conditions	E	Line192-195
Amount of RNA and reaction volume	E	Line191-195
Priming oligonucleotide (if using GSP) and concentration	E	Line191-192
Reverse transcriptase and concentration	E	Line186-188
Temperature and time	E	Line193-195
Manufacturer of reagents and catalogue numbers	D
Cqs with and without RT	D*
Storage conditions of cDNA	D
qPCR TARGET INFORMATION
If multiplex, efficiency and LOD of each assay.	E
Sequence accession number	E	Line192（Table S1）
Location of amplicon	D
Amplicon length	E	Line192（Table S1）
In silico specificity screen (BLAST, etc)	E	Line192（Table S1）
Pseudogenes, retropseudogenes or other homologs?	D
Sequence alignment	D
Secondary structure analysis of amplicon	D
Location of each primer by exon or intron (if applicable)	E	Line192（Table S1）
What splice variants are targeted?	E	Line192（Table S1）
qPCR OLIGONUCLEOTIDES
Primer sequences	E	Line192（Table S1）
RTPrimerDB Identification Number	D
Probe sequences	D**
Location and identity of any modifications	E	Line192（Table S1）
Manufacturer of oligonucleotides	D
Purification method	D
qPCR PROTOCOL
Complete reaction conditions	E	Line195-197
Reaction volume and amount of cDNA/DNA	E	Line193-194
Primer, (probe), Mg++ and dNTP concentrations	E	Line193-194
Polymerase identity and concentration	E	Line195-197
Buffer/kit identity and manufacturer	E	Line193-197
Exact chemical constitution of the buffer	D
Additives (SYBR Green I, DMSO, etc.)	E	Line190-192
Manufacturer of plates/tubes and catalog number	D
Complete thermocycling parameters	E	Line195-196
Reaction setup (manual/robotic)	D
Manufacturer of qPCR instrument	E	Line190
qPCR VALIDATION
Evidence of optimisation (from gradients)	D
Specificity (gel, sequence, melt, or digest)	E	Line192（Table S1）
For SYBR Green I, Cq of the NTC	E	Line388（Table S7）
Standard curves with slope and y-intercept	E	Line388（Table S7）
PCR efficiency calculated from slope	E	Line388（Table S7）
Confidence interval for PCR efficiency or standard error	D
r2 of standard curve	E	Line388（Table S7）
Linear dynamic range	E	Line388（Table S7）
Cq variation at lower limit	E	Line388（Table S7）
Confidence intervals throughout range	D
Evidence for limit of detection	E	Line388（Table S7）
If multiplex, efficiency and LOD of each assay.	E	Line388（Table S7）
DATA ANALYSIS
qPCR analysis program (source, version)	E	Line197-198
Cq method determination	E	Line197-198
Outlier identification and disposition	E	Line197-198
Results of NTCs	E	Line388（Table S7
Justification of number and choice of reference genes	E	Line188-189（Table S1）
Description of normalisation method	E	Line197-198
Number and concordance of biological replicates	D
Number and stage (RT or qPCR) of technical replicates	E	Line197
Repeatability (intra-assay variation)	E	Line197-200
Reproducibility (inter-assay variation, %CV)	D
Power analysis	D
Statistical methods for result significance	E	Line197-200
Software (source, version)	E	Line197-200
Cq or raw data submission using RDML	D
Table 1. MIQE checklist for authors, reviewers and editors. All essential information (E) must be submitted with the manuscript. Desirable
information (D) should be submitted if available. If using primers obtained from RTPrimerDB, information on qPCR target, oligonucleotides,
protocols and validation is available from that source.
*: Assessing the absence of DNA using a no RT assay is essential when first extracting RNA. Once the sample has been validated as
RDNA-free, inclusion of a no-RT control is desirable, but no longer essential.
**: Disclosure of the probe sequence is highly desirable and strongly encouraged. However, since not all commercial pre-designed assay
vendors provide this information, it cannot be an essential requirement. Use of such assays is advised against.
